# Supplementary material for: Study of chromatographic fractions from carbon dots isolated by column chromatography and a binary gradient elution via RP-HPLC
Source: Royal Society of Chemistry journal article supplement (doi:10.1039/c8ay02660b), 2018-12-19
Supplement: c8ay02660b1.pdf [file c8ay02660b1.pdf]

## SUPPORTING INFORMATION

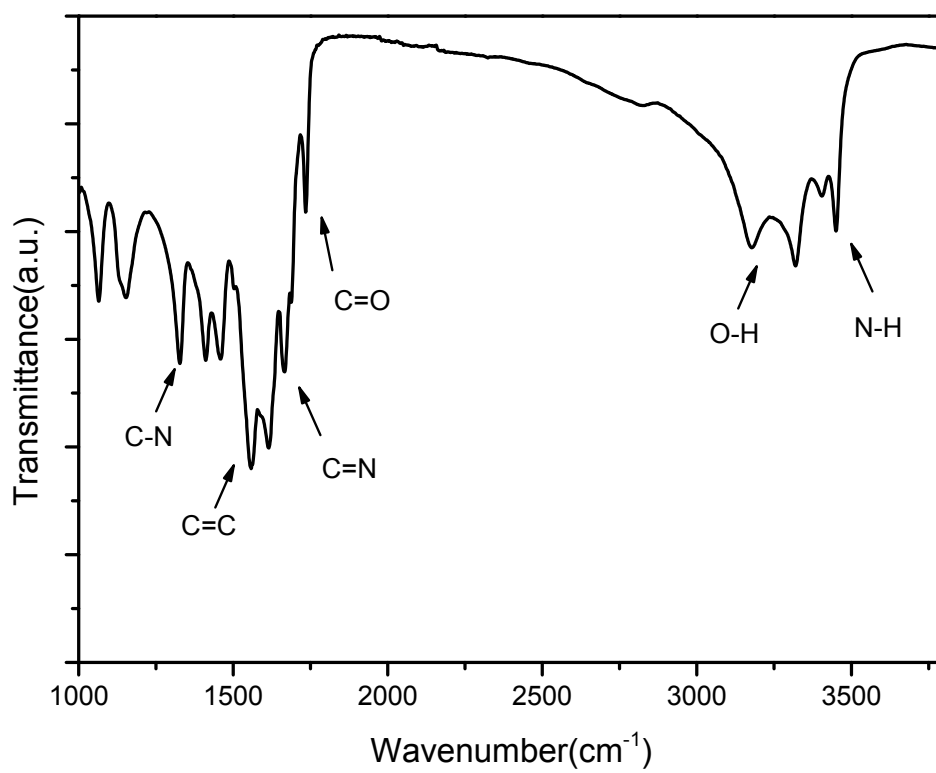

**Figure S-1.** FTIR spectra of prepared C-dots

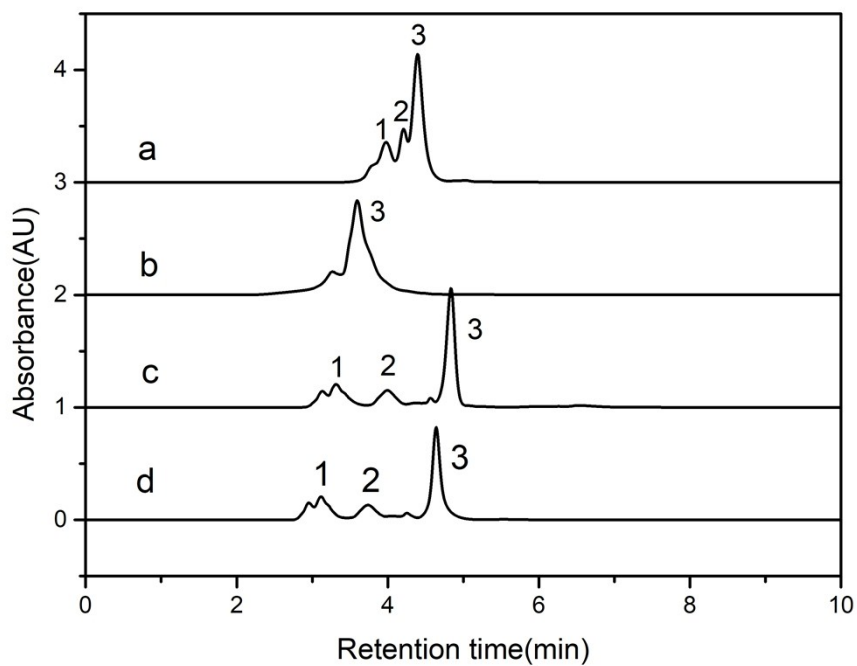

**Figure S-2.** The separation of C-dots at different of ratio of flow rates of water-methanol in isocratic elution (v/v): (a)  $0.16 \text{ mL min}^{-1}$ :  $0.64 \text{ mL min}^{-1}$ , (b)  $0.32 \text{ mL min}^{-1}$ :  $0.48 \text{ mL min}^{-1}$ , (c)  $0.48 \text{ mL min}^{-1}$ :  $0.32 \text{ mL min}^{-1}$  and (d)  $0.64 \text{ mL min}^{-1}$ :  $0.16 \text{ mL min}^{-1}$ . Total flow rate was  $0.8 \text{ mL min}^{-1}$ . The detection wavelength was  $410 \text{ nm}$ . The temperature was  $35^\circ\text{C}$ . The injection volume of the C-dots samples was  $20 \mu\text{L}$  (the concentration was  $1.0 \text{ mg mL}^{-1}$ ).

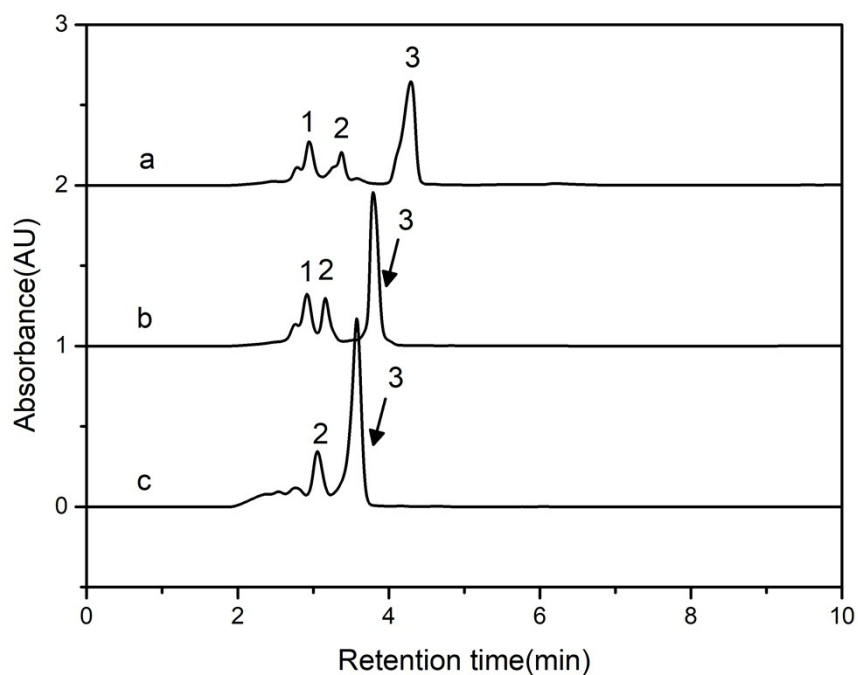

**Figure S-3.** The separation of C-dots was used by gradient elution. The different gradient elution programs were as follows: (a) 0 to 2 min 90 % water and 10 % methanol; 2 to 8 min 0 % water and 50%methanol, then holding up to 10 min. (b) 0 to 2 min 80 % water and 20 % methanol; 2 to 8 min 50 % water and 50 % methanol, then holding up to 10 min. (c) 0 to 2 min 70% water and 30% methanol; 2 to 8 min 50 % water and 50% methanol, then holding up to 10 min. Other conditions as in Fig. S-2

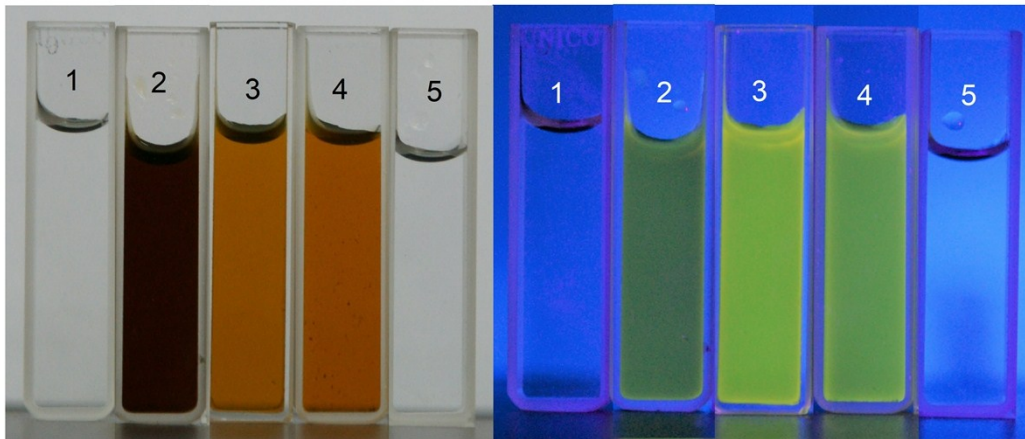

**Figure S-4.** The photographs of the different ratios of Citric acid /Urea: were visualized under white light (left) and under a UV lamp (365 nm, right). (1) 6.0 g: 0.0 g, (2) 4.0 g: 2.0 g, (3) 3.0 g: 3.0 g, (4) 2.0 g: 4.0 g, (5) 0.0: 6.0 g

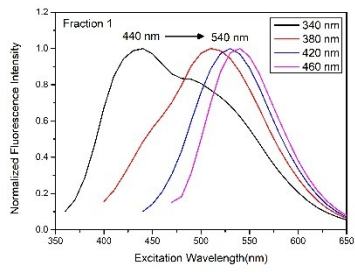

(1)

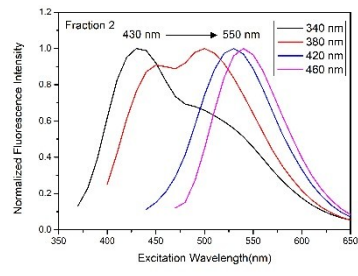

(2)

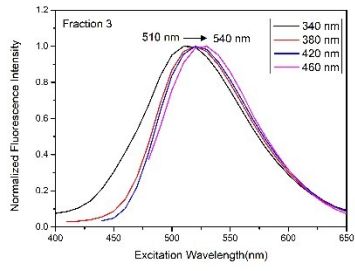

(3)

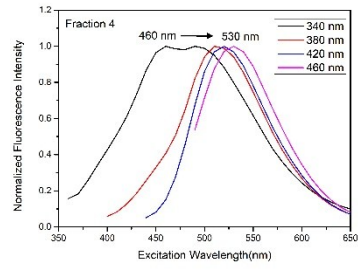

(4)

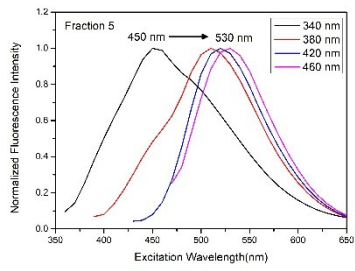

(5)

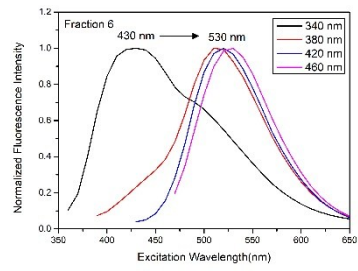

(6)

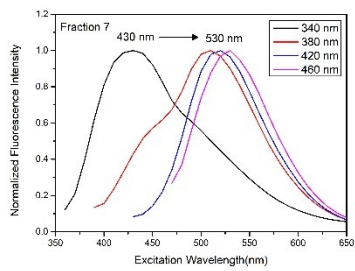

(7)

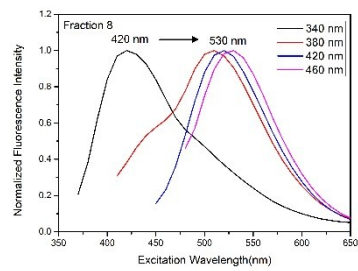

(8)

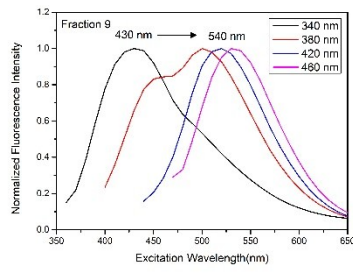

(9)

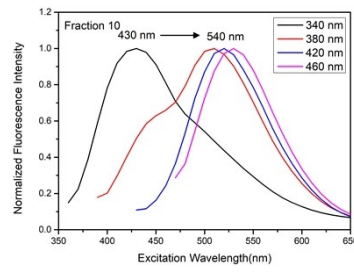

(10)

**Figure S-5.** Fluorescence emission spectrum of fractions separated by silica gel column chromatography; excitation wavelength: 340 - 460 nm; (1) - (10) fractions (1-10) collected after separation.
